# Supplementary material for: GA-Mediated Disruption of RGA/BZR1 Complex Requires HSP90 to Promote Hypocotyl Elongation
Source: MDPI journal article supplement (doi:10.3390/ijms24010088), 2022-12-21
Supplement: s1 [file s1]

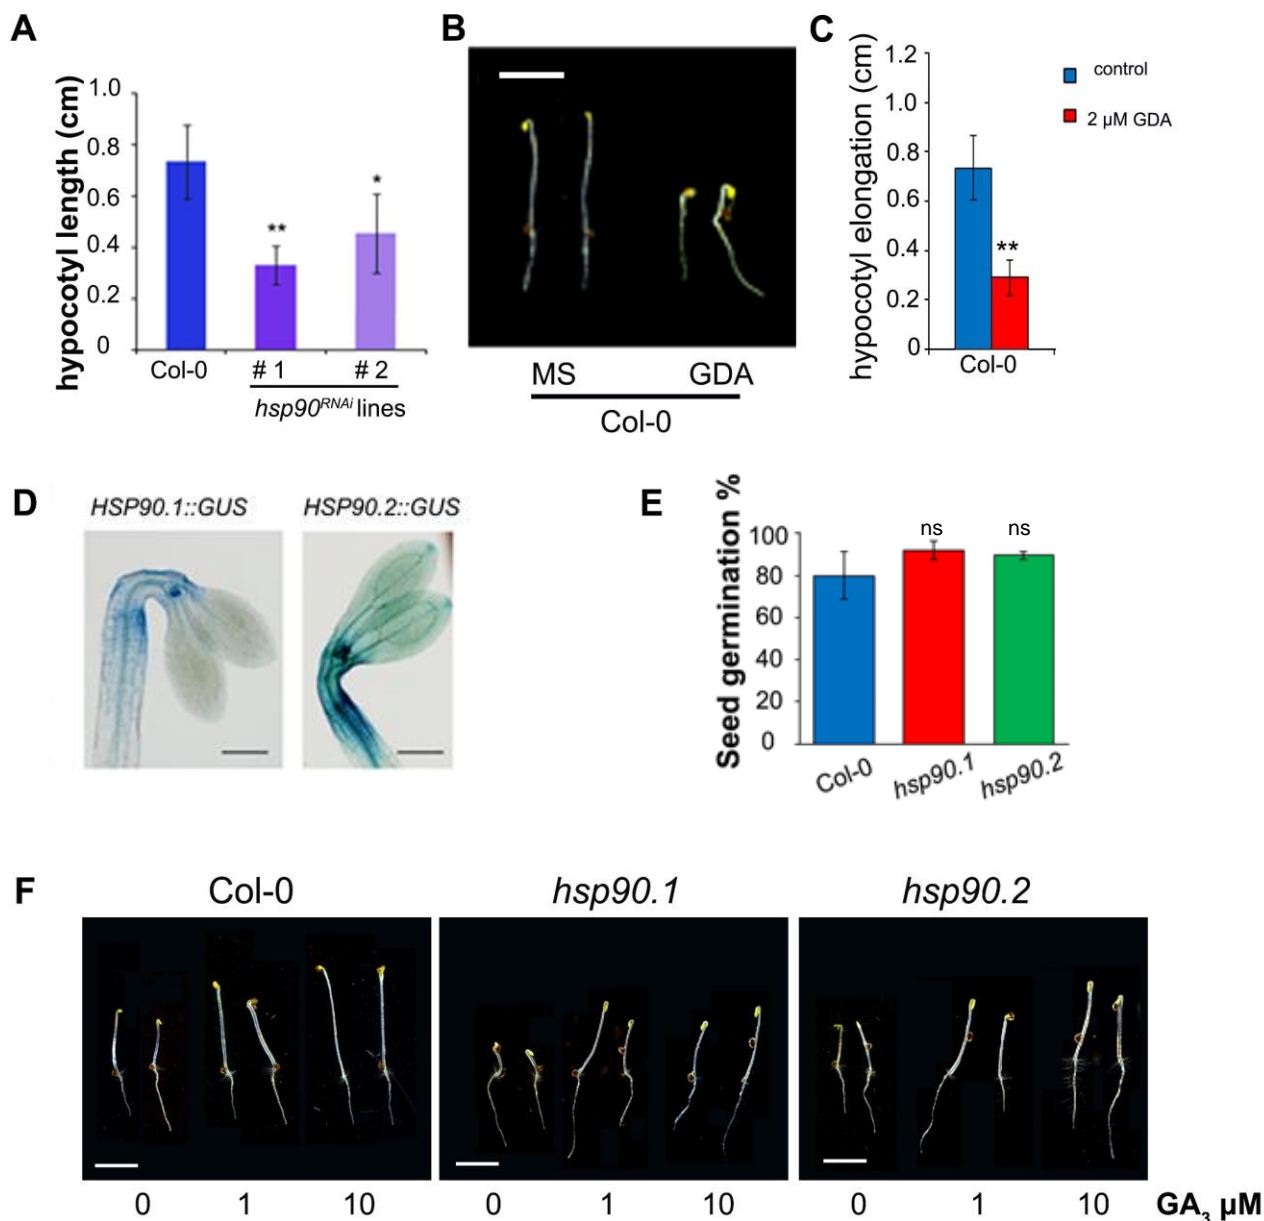

**Figure S1.** *HSP90.1* and *HSP90.2* genes are expressed in etiolated hypocotyls. **(A)** Hypocotyl length of 5-day-old etiolated seedlings of wild type (Col-0) and two independent *hsp90<sup>RNAi</sup>* lines grown in MS medium. Number of measurements,  $n > 30$ . **(B)** The hypocotyl elongation of 5-day-old wild-type (Col-0) etiolated seedlings grown in medium supplemented with 2  $\mu$ M GDA, was inhibited. Scale bars, 0.5 cm. **(C)** Hypocotyl length measurements of seedlings shown in (C). Number of measurements,  $n > 30$ . Data are means and error bars indicate  $\pm$ SD. (\*):  $p < 0.05$ , (\*\*):  $p < 0.01$ , ns: non-significant according to two-tailed students' t-test. Black asterisks, comparison to Col-0. **(D)** *HSP90.1::GUS* and *HSP90.2::GUS* in the hypocotyls of 5-day old etiolated seedlings. Scale bars, 20  $\mu$ m. **(E)** Percentages (%) of seed germination in the dark of Col-0, *hsp90.1* and *hsp90.2* are means ( $\pm$ SD) from three independent experiments (50 seeds per experiment). **(F)** Phenotypes of 5-day-old etiolated seedlings of *hsp90.1* and *hsp90.2* mutants grown in the presence of different concentrations of GA<sub>3</sub>. Scale bars, 0.5 cm

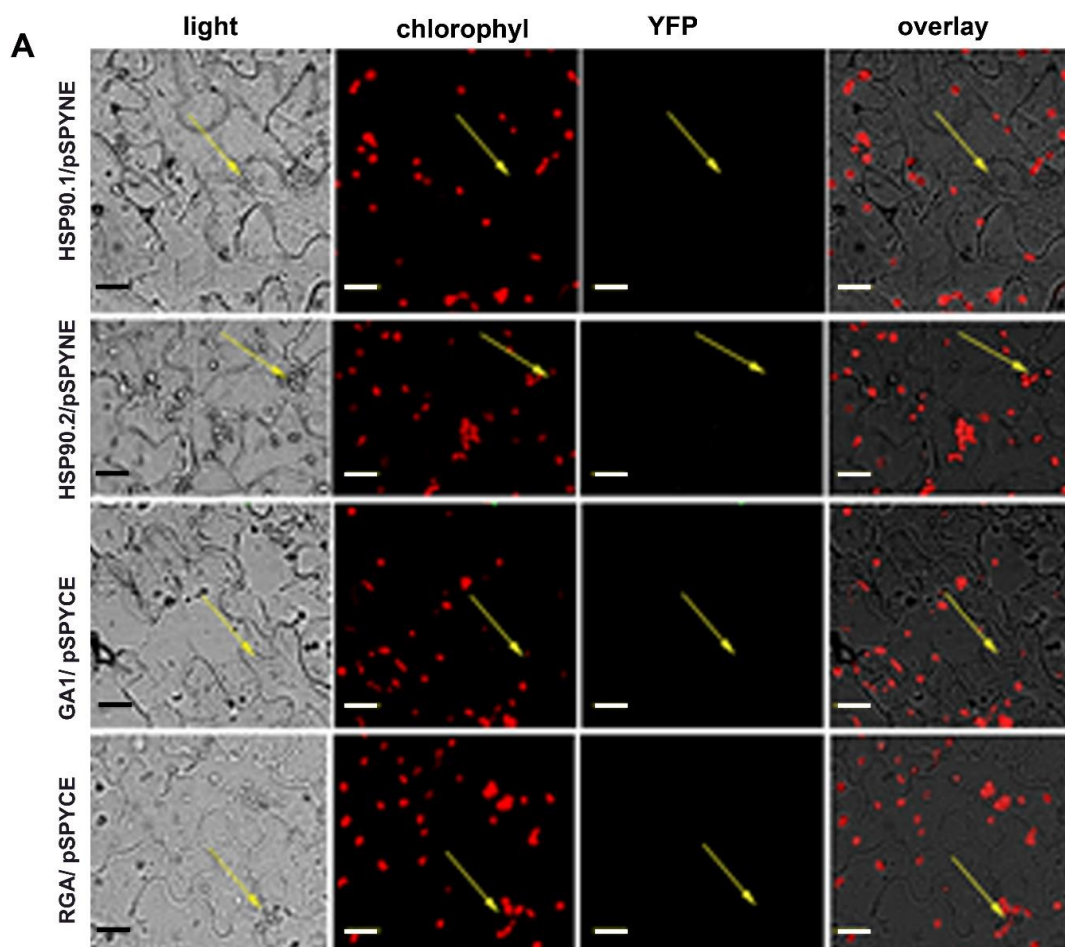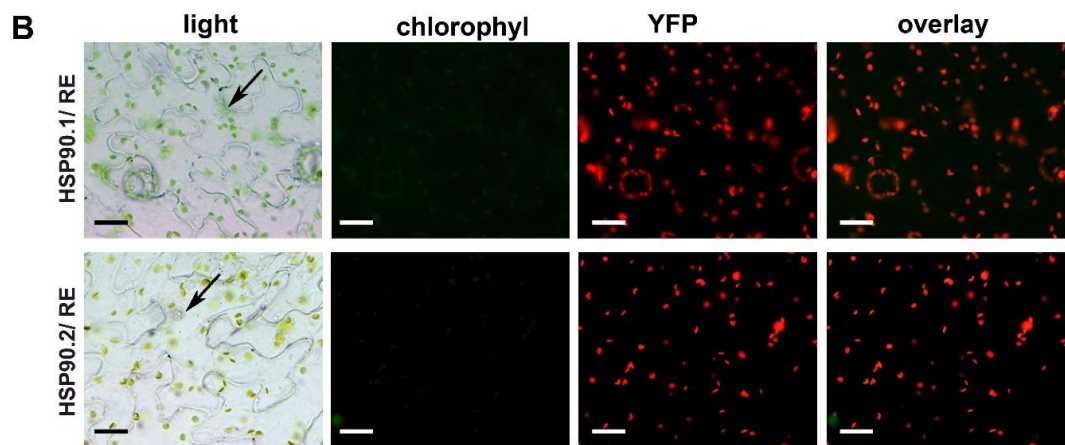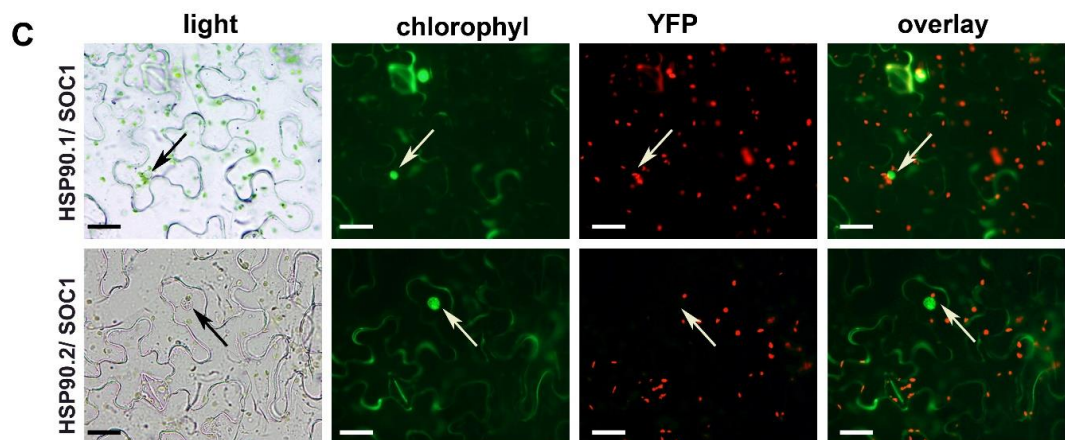

**Figure S2.** Negative and positive controls of BiFC interaction assays of HSP90.1 and HSP90.2 with RGA or GAI. **(A)** *N. benthamiana* leaf epidermal cells co-transformed with HSP90.1- or HSP90.3-YFPc and pSPYNE-nYFP, or with pSPYCE-YFPc and GAI-nYFP or RGA-nYFP, were used as controls. No fluorescence was detected. **(B)** HSP90.1 and HSP90.2 do not interact with RABBIT EARS (RE) [37], and therefore were introduced in *N. benthamiana* leaf epidermal cells as negative controls. No fluorescence was detected. **(C)** Both HSP90.1 and HSP90.2 interact with SUPPRESSOR OF OVEREXPRESSION OF CONSTANS1 (SOC1) [37], and therefore, were introduced in *N. benthamiana* leaf epidermal cells as positive controls. Reconstituted fluorescent signals in the nucleus and cytoplasm demonstrated protein-protein interactions in both cellular compartments. Arrows indicate the nuclei. Scale bars, 20  $\mu$ m.

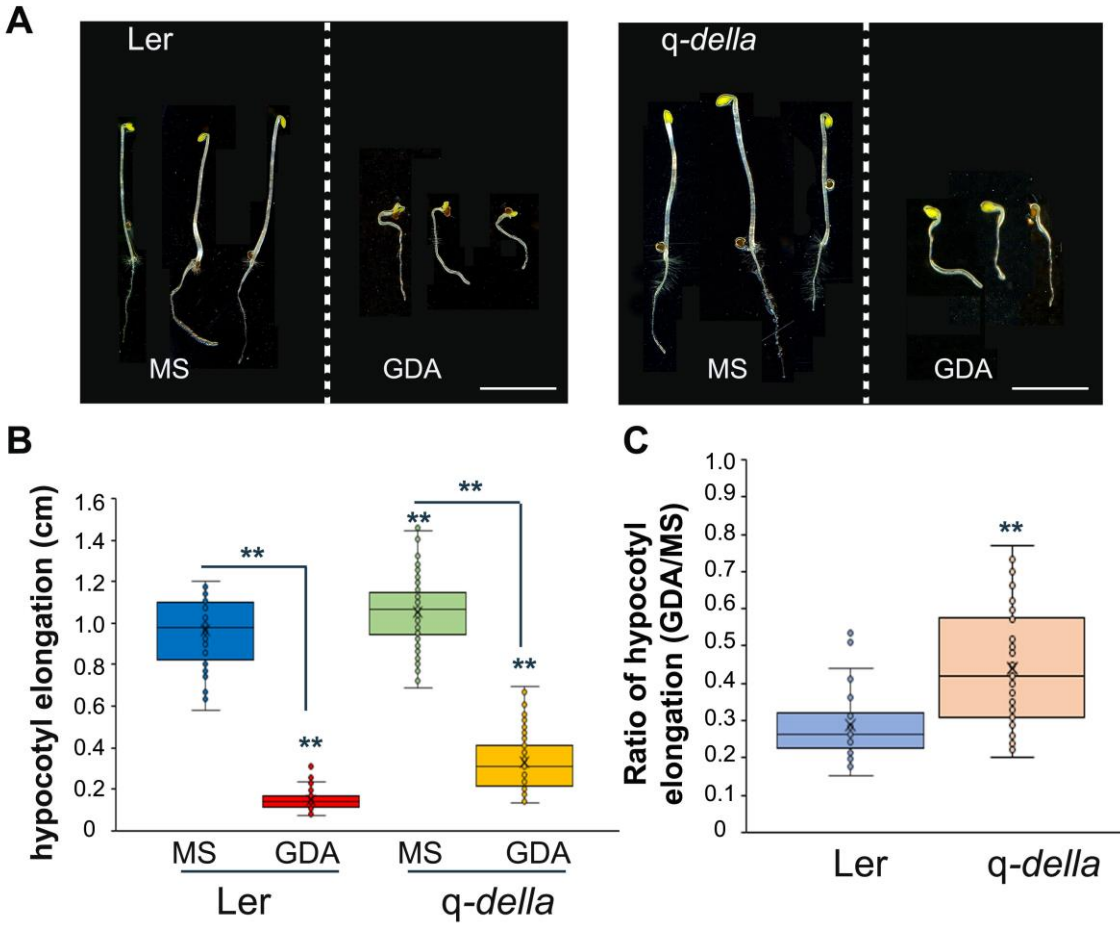

**Figure S3.** The hypocotyl growth of *q-della* mutants is partially insensitive to the inhibition of HSP90 function. **(A)** Hypocotyl images of 5-day-old wild type (Ler) and pentuple *della* etiolated seedlings grown in MS medium in the absence or presence of 2 $\mu$ M GDA. Scale bars, 0.5 cm. **(B)** Hypocotyl lengths of seedlings shown in **(A)**. Data are presented as means and error bars indicate  $\pm$ SD. Number of seedlings,  $n > 30$ . Data were analyzed with one-way ANOVA followed by Tukey's test, (\*\*):  $p < 0.01$ . **(C)** Hypocotyl length ratios (GDA/MS) of the quantified hypocotyl lengths in **(B)**. Data are presented as means and error bars indicate  $\pm$ SD. Number of measurements  $\geq 30$ . Significant difference was compared to respective wild type. Student's t-test was performed (\*\*):  $p < 0.01$ ).

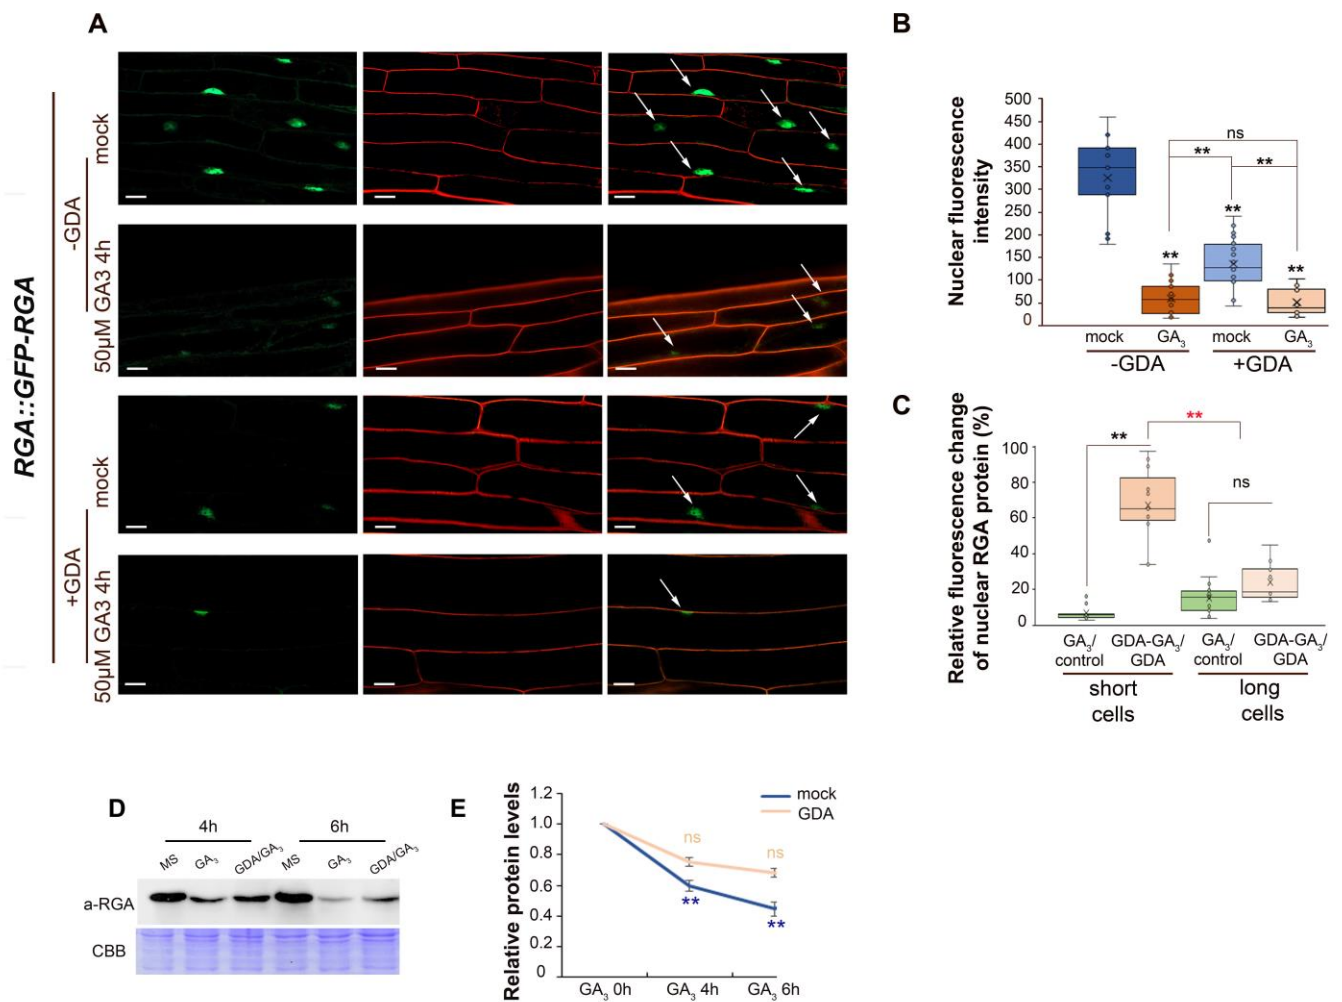

**Figure S4.** The effect of HSP90 pharmacological inhibition on RGA protein levels in the elongated hypocotyl cells of dark grown seedlings. **(A)** Fluorescent images of fully elongated hypocotyl cells showing GFP- RGA levels. 5-day-old etiolated *RGA::RGA-GFP* seedlings with or without 50μM GA<sub>3</sub> treatment for 4h, in the absence or presence of 2μM GDA for 12h. The cell patterns were visualized by using PI. Scale bars, 50 μm. **(B)** Quantification of the nuclear fluorescence intensity in fully elongated hypocotyl cells of 5-day-old etiolated seedlings treated as indicated in (A). Box plots display the first and third quartiles, split by the median; whiskers extend to include the max/min values. Statistical analysis was performed using one-way analysis of variance (ANOVA) followed by Tukey test for multiple comparisons, \*\*p<0.01. **(C)** Nuclear GFP-RGA fluorescence change (%) was assessed by the fluorescence ratios of short (**Figure 3B**) and long hypocotyl cells (**B**) under the indicated treatments, respectively. Statistical analysis was performed using two-way analysis (ANOVA) followed by Tukey test **(D)** Time course analysis of RGA protein levels in 5-day-old etiolated seedlings grown in control conditions and then treated with 25 μM GA<sub>3</sub> or 2 μM GDA and 25 μM GA<sub>3</sub> for the indicated time. Coomassie brilliant blue (CBB) was used for the evaluation of total protein levels. **(E)** Quantification of RGA relative protein levels after GA<sub>3</sub> application in the presence or absence of 2 μM GDA. Data are means and error bars indicate ±SD. (\*\*): P<0.01, ns: non-significant according to one-way analysis ANOVA followed by Tukey for multiple comparison.



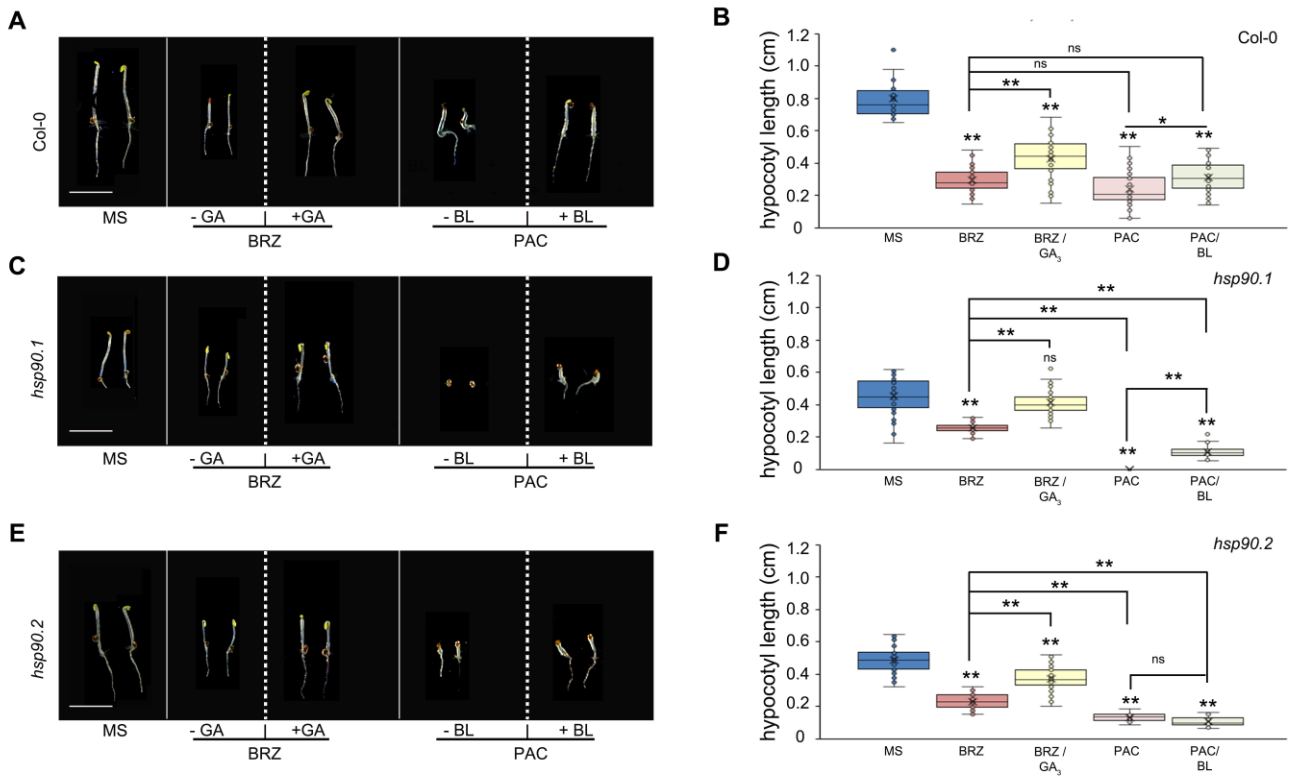

**Figure S5.** Hypocotyl elongation assays of wild type *hsp90* etiolated seedlings under deficiency of BRs or GAs. (**A**, **C**, **E**) Images of 5-day-old etiolated seedlings Col-0 (**A**), *hsp90.1* (**C**) and *hsp90.2* (**E**) growing in the indicated conditions. (**B**, **D**, **F**) Hypocotyl elongation of 5-day-old Col-0 (**B**), *hsp90.1* (**D**) and *hsp90.2* (**F**) growing on control MS medium, or in the presence of 0.5  $\mu$ M BRZ, or in combination of 0.5  $\mu$ M BRZ with 10  $\mu$ M GA<sub>3</sub> or in the presence of 0.1  $\mu$ M PAC or in combination of 0.1  $\mu$ M PAC with 60 nM BL. Box plots display the first and third quartiles, split by the median; whiskers extend to include the max/min values. Statistical analysis was performed using one-way analysis of variance (ANOVA) followed by Tukey test for multiple comparisons, ns: non-significant, \*  $p < 0.05$ , \*\*  $p < 0.01$ .

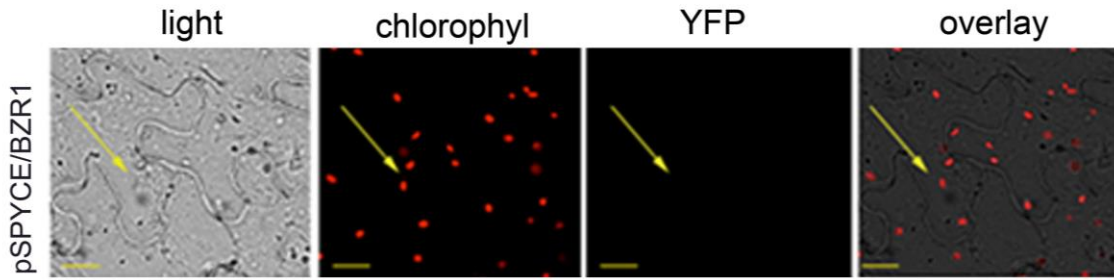

**Figure S6.** Negative control of HSP90.1 or HSP90.2 BiFC interaction assays with BZR1. *N. benthamiana* leaf epidermal cells co-transformed with pSPYCE-YFPc and BZR1-nYFP were used as controls. No fluorescence was detected. Arrows indicate the nucleus. Scale bars, 20  $\mu\text{m}$ .

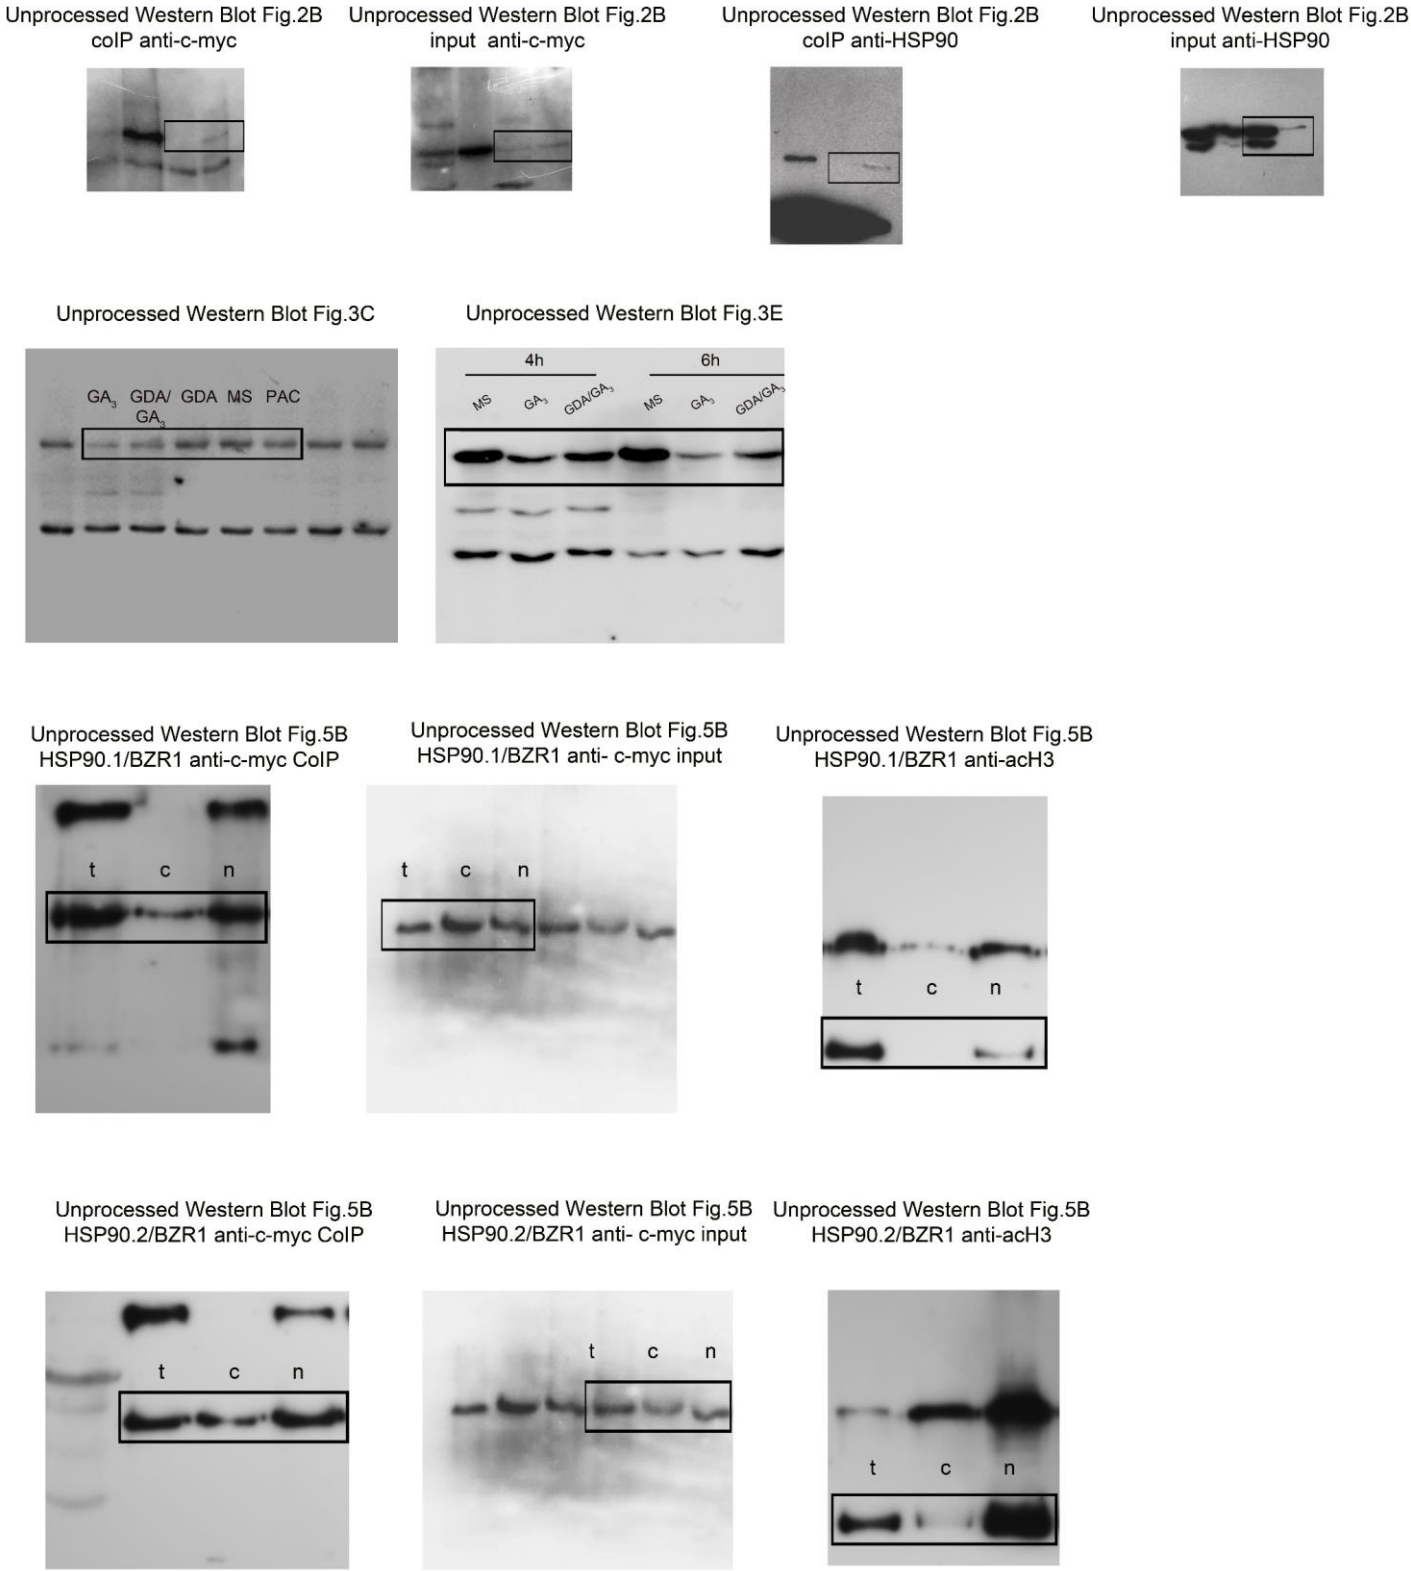

**Figure S7.** Unprocessed Western blot images used in this study.



Table S1. List of primers used in this study

| <b>Primers for yeast two hybrid interactions</b> |                 |                                             |
|--------------------------------------------------|-----------------|---------------------------------------------|
| Gene                                             | Primer          | Sequence                                    |
| At5g52640                                        | Hsp90.1yeastFor | 5'-AAAGGATCCCGATGGCGGATGTTTCAG-3'           |
|                                                  | Hsp90.1yeastRev | 5'-TTTCTCGAGGTCGACTTCCTCCATCTTGC-3',        |
| At5g56030                                        | Hsp90.2yeastFor | 5'-ATACATATGATGGCGGACGCTGAAACC-3'           |
|                                                  | Hsp90.2yeastRev | 5'-ATAATCGATTTAGTCGACTTTTGTGTG-3'           |
| At1g75080                                        | Bzr1yeastFor    | 5'-TTTTCATATGATGACTTCGGATGGAGCTACGTCG-3'    |
|                                                  | Bzr1yeastRev    | 5'-AAAACCCGGGACCACGAGCCTTCCCA-3'            |
| At2g01570                                        | RGA1yeast For   | 5'-CCTCGGATCCGAATGAAGAGAGATCATCATCATC-3'    |
|                                                  | RGA1yeast Rev   | 5'-ATTTGTCGACATTGGTGGAGAGTTTCCACGC-3'       |
| At1g14920                                        | GAI1yeast For   | 5'-ATATGGATCCGAATGAAGAGAGATCATCACCAATTCC-3' |
|                                                  | GAI1yeast Rev   | 5'-TTTTGTCGACGTACGCCGCCGTCGA-3'             |
|                                                  |                 |                                             |
|                                                  |                 |                                             |
| <b>Primers for BiFC constructs</b>               |                 |                                             |
| Gene                                             | Primer          | Sequence                                    |
| At5g52640                                        | Hsp90.1splitFor | 5'-TTAATGGATCCAAGTTCGTTGCGATGGCGGATG-3'     |
|                                                  | Hsp90.1splitRev | 5'-TTTCTCGAGGTCGACTTCCTCCATCTTGC-3'         |
| At5g56030                                        | Hsp90.2splitFor | 5'-ATATCTAGAACGACAATGGCGGACGCTGAAACC-3'     |
|                                                  | Hsp90.2splitRev | 5'-ATAGGTACCGTCGACTTCCTCCATCTT-3'           |
| At1g75080                                        | Bzr1splitFor    | 5'-ACTAGTATGACTTCGGATGGAGCTACG-3'           |
|                                                  | Bzr1splitRev    | 5'-TTTTGGTACCACCACGAGCCTTCCCATTTC-3'        |
| At2g01570                                        | RGA1split For   | 5'-CCTCGGATCCATGAAGAGAGATCATCATCATC-3'      |
|                                                  | RGA1split Rev   | 5'-ATTTGTCGACATTGGTGGAGAGTTTCCACGC-3'       |
| At1g14920                                        | GAI1split For   | 5'-ATATGGATCCATGAAGAGAGATCATCACCAATTCC-3'   |
|                                                  | GAI1split Rev   | 5'-TTTTGTCGACGTACGCCGCCGTCGA-3'             |
|                                                  |                 |                                             |
|                                                  |                 |                                             |
| <b>Primers for Quantitative RT PCR (qPCR)</b>    |                 |                                             |
| Gene                                             | Primer          | Sequence                                    |
|                                                  | oligo -dT       | 5'-GTCGACCTCGAGTTTTTTTTTTTTTTTTT-3'         |
| At1g02400                                        | qGA2ox6 - F     | 5'-ATCCAACGACGTAGATGGACTTG-3'               |
|                                                  | qGA2ox6 - R     | 5'-CCTATGCCTCACGCTAGTGAAT-3'                |
| At1g05160                                        | qKAO1 fwd       | 5'-TGAGGTTCTACAAAGAGCAAAGGC-3'              |
|                                                  | qKAO1 rev       | 5'-ACTCGAAGTGTCTCATCGACAACC-3'              |
| At4g25420                                        | qGa20_ox1 fwd   | 5'-AGATTACTTCTGCGATGCGTTGG-3'               |
|                                                  | qGa20_ox1 rev   | 5'-CGAATGGAGCGCCATTGATTTTC-3'               |
| At1g30040                                        | qGa2_ox2 fwd    | 5'-AGATGGAAGTTGGGTCGCTGTC-3'                |
|                                                  | qGa2_ox2 rev    | 5'-TGTATCGGCTAAGACCCTGTG-3'                 |
| At1g15550                                        | qGA3ox1 - F     | 5'-GTCTAGCAGCTCATACCGACTC-3'                |
|                                                  | qGA3ox1 - R     | 5'-CCATTGGATAGGATGTGGAAGAGG-3'              |
| At1g13440                                        | qGAPDH - F      | GCCAAGAAGGTTGTTATCTCTGCCC-3'                |
|                                                  | qGAPDH - R      | 5'-GCTCGACCTGTTGTCGCCAACG-3'                |
| At2g37640                                        | qEXP3-F         | 5'-TCCATCTATTCTTGTGACGGCGAC-3'              |

|           |          |                                    |
|-----------|----------|------------------------------------|
|           | qEXP3-R  | 5' -TCCCTCCTATCTTCCGACAAGGTA-3'    |
| At2g40610 | qEXP8 F  | 5' -TCCTCCTCTTCAGCATTTTCGACCT-3'   |
|           | qEXP8 R  | 5' -CTTGCCACGACTGTGTTTTTGAGC-3'    |
| At4g30290 | qXTH19-F | 5' -GACCCAACCGCTAACTTTCACAC-3'     |
|           | qXTH19-R | 5' -AGGAGCTTTTGACCAATCTGTTTTCTC-3' |
| At1g10550 | qXTH33-F | 5' -ATACCCTCATTTGGAACCTCCAC-3'     |
|           | qXTH33-R | 5' -CACTTAACTCCACGTCAGCAACG-3'     |
